# Supplementary material for: Unstructured 5′-tails act through ribosome standby to override inhibitory structure at ribosome binding sites
Source: PubMed Central journal article supplement — Nucleic Acids Res. 2018 Feb 6;46(8):4188–99. doi: 10.1093/nar/gky073 (PMC5934652; doi:10.1093/nar/gky073), 2018-02-06
Supplement: gky073_supp.pdf [file gky073_supp.pdf]

## Supplementary data

Unstructured 5'-tails act through ribosome standby  
to override inhibitory structure at ribosome binding sites

Maaïke Sterk, Cédric Romilly, and E. Gerhart H. Wagner\*

Department of Cell and Molecular Biology, Biomedical Center,  
Uppsala University, Box 596, S-75124 Uppsala, Sweden

**Figure S1**

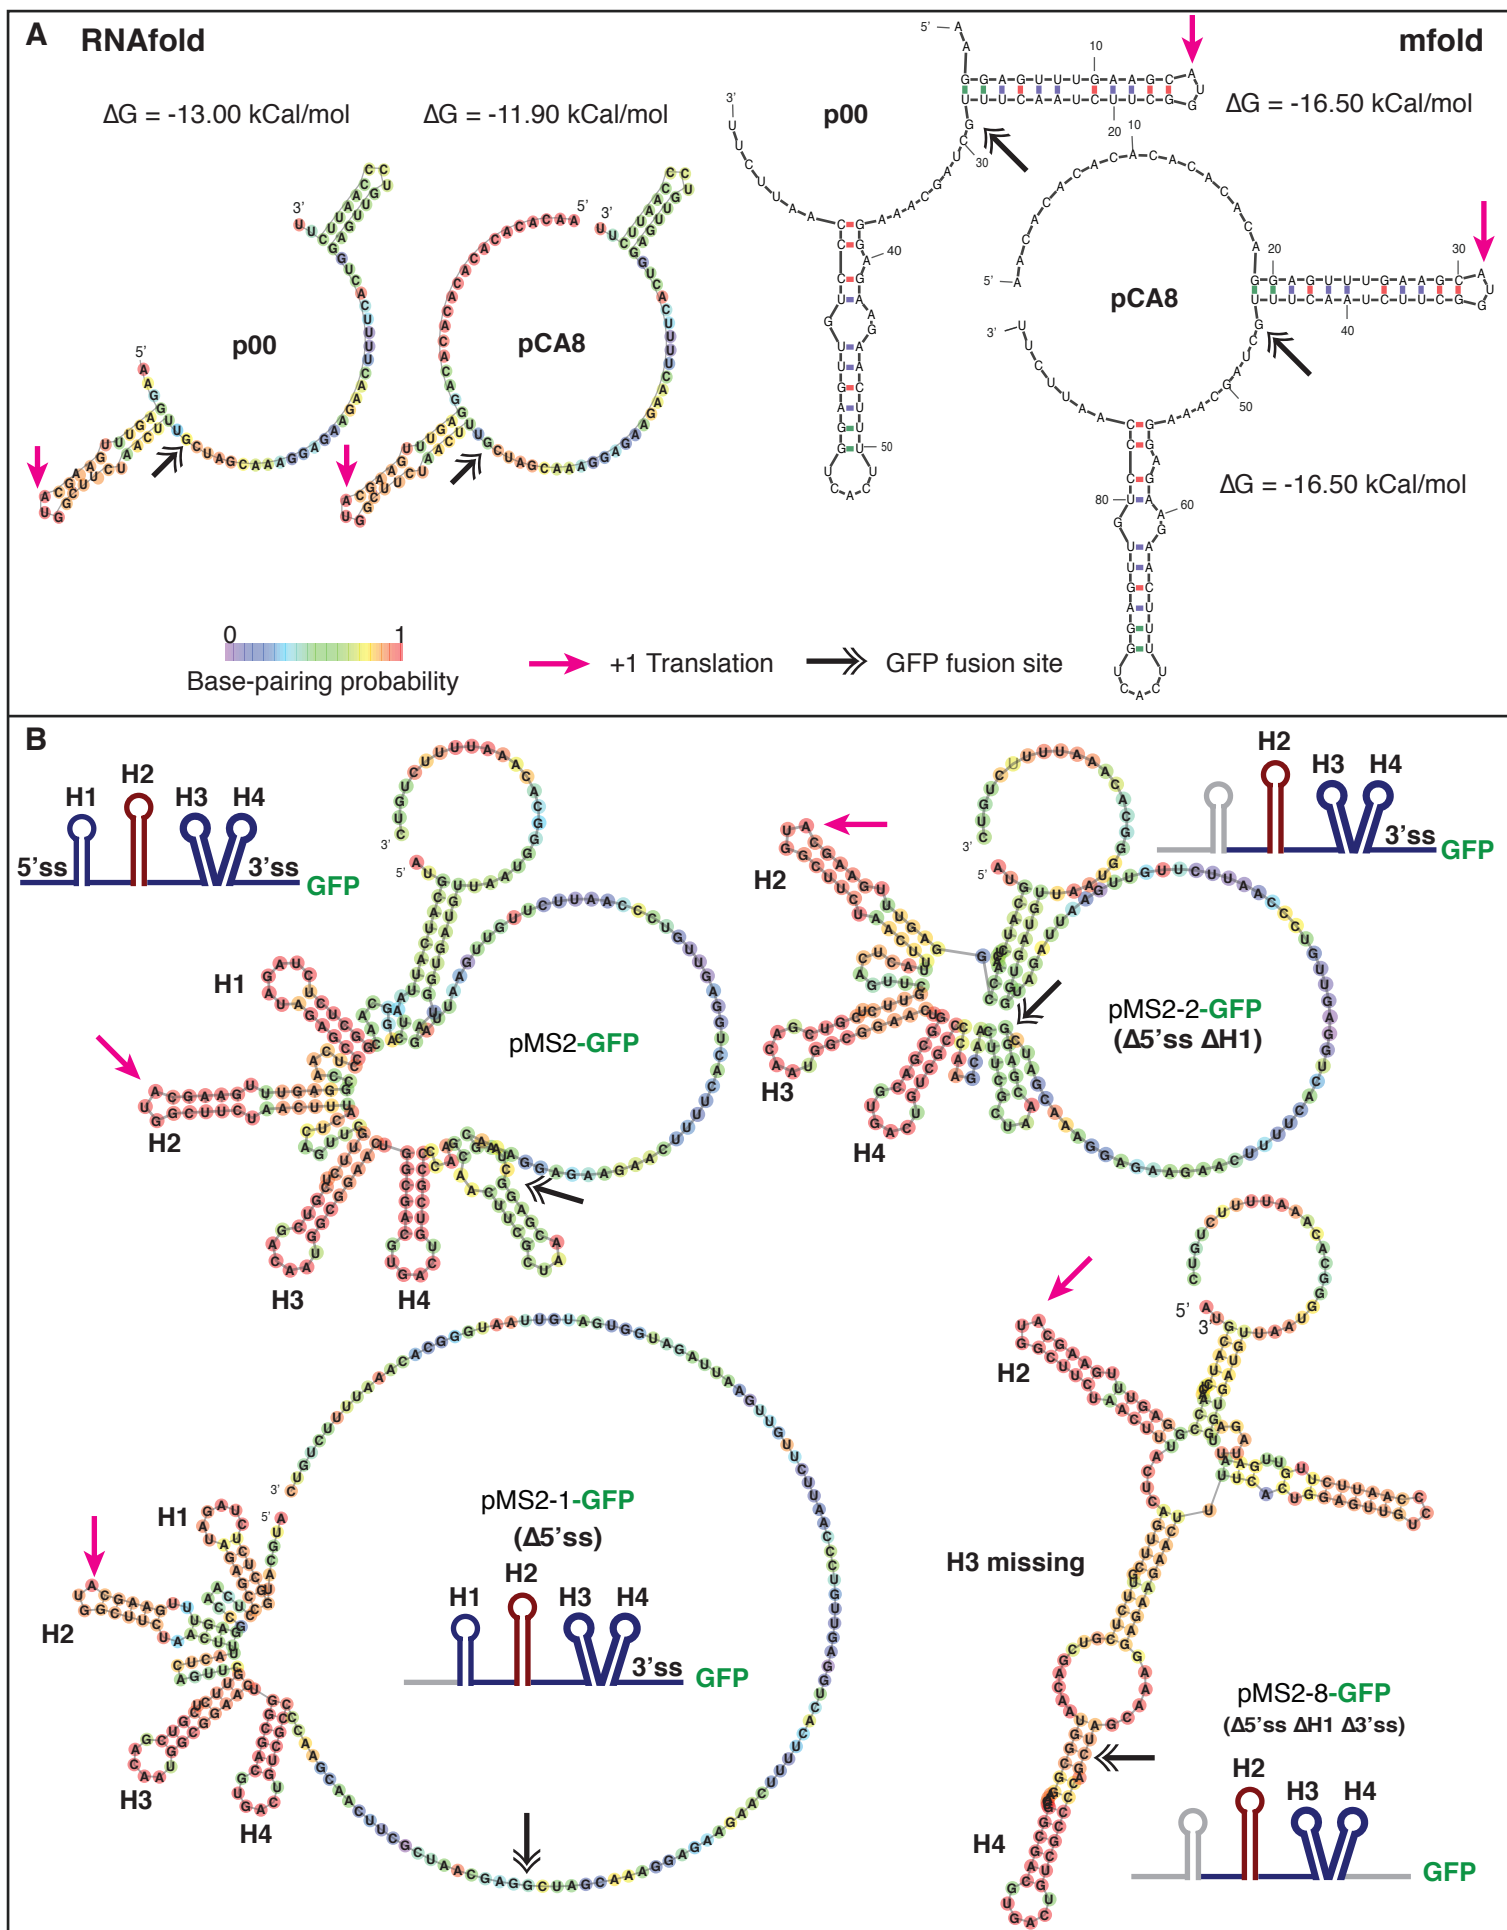

**Figure S1:** legend next page

**Figure S1:** RNA structure predictions of coat RBS structure ± standby regions in conjunction with flanking *gfp* sequences.

(A) Secondary structure prediction of mRNAs from constructs p00 and pCA8 including 60 nt of *gfp* sequences immediately downstream of the RBS stem-loop. Left: RNAfold predictions (<http://rna.tbi.univie.ac.at/cgi-bin/RNAWebSuite/RNAfold.cgi>) (Gruber et al., 2008) using “centroid” image output. The structures are colored according to base-pairing probability from 0 (purple) to 1 (red). If a nucleotide is in a single-stranded segment, the color denotes the probability of the said residue to be unpaired. Red arrow: translation start codon, black double head arrow: fusion site to *gfp*. Right: mfold predictions (<http://unafold.rna.albany.edu/?q=mfold/rna-folding-form>) (Zuker, 2003).

(B) Secondary structure predictions of mRNAs for constructs pMS2, pMS2-1, pMS2-2 and pMS2-8 using RNAfold (centroid view). For each prediction, 87 nt of *gfp* sequence was included. The schematic structure of the elements in the MS2 standby side, based on previously published data (De Smit and Van Duin, 2003), is indicated in blue with key elements, namely 5'ss, H1, H2, H3, H4 and 3'ss (upper left corner). For the other three structures, the same kind of schematics is shown, but with grey elements indicating deleted segments (pMS2-1 ( $\Delta$ 5'ss), pMS2-2 ( $\Delta$ 5'ss  $\Delta$ H1), and pMS2-8 ( $\Delta$ 5'ss  $\Delta$ H1  $\Delta$ 3'ss)). The predicted relative  $\Delta G^0$ -values are: pMS2-GFP ( $\Delta G$  -51,7 kcal/mol), pMS2-1-GFP ( $\Delta G$  -36.7 kcal/mol), pMS2-2-GFP ( $\Delta G$  -39.1 kcal/mol), pMS2-8 ( $\Delta G$  -45.1 kcal/mol). Base pairing probability scale and arrows as in A.

#### References:

Gruber AR, Lorenz R, Bernhart SH, Neuböck R, Hofacker IL. [The Vienna RNA Websuite](#). *Nucleic Acids Res.* Jul 1;36( (2008)

M. Zuker Mfold web server for nucleic acid folding and hybridization prediction. *Nucleic Acids Res.* 31, 3406-15, (2003)

De Smit MH and Van Duin J Translational Standby Sites: How Ribosomes May Deal with the Rapid Folding Kinetics of mRNA *J. Mol. Biol.* 33, 737-743 (2003)

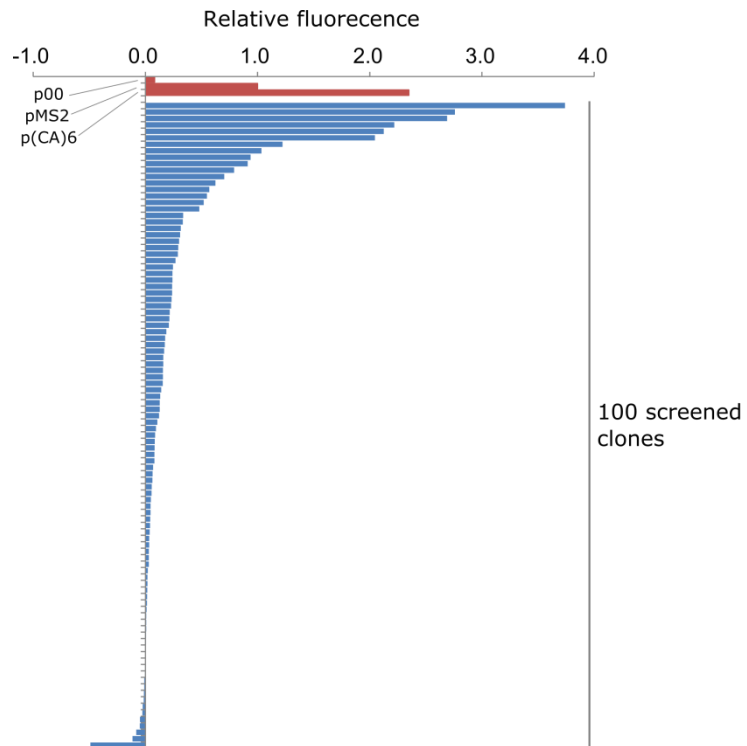

**Figure S2:** Relative *in vivo* expression of 100 constructs with an insert of 12 random nucleotides, similar to p(CA)6, as measured by plate reader. For comparison, values of p00, pMS2 and p(CA)6 are shown (in red). The majority of constructs confer expression levels close to background.

**Table S1:** Primers used for strain constructions

| Name    | Sequence                                                   | Fw/Rev | Used for                             |
|---------|------------------------------------------------------------|--------|--------------------------------------|
| EHO-444 | GGAGUUUGAAGCAUGGCUUCAACUUUGCTAGCAAAGGAGAAGAACTTTTCACTGGAGT | fw     | pEH108                               |
| EHO-445 | GCTTTTTTATTGATCGCACACCTGACAGCTGC                           | rev    | pEH108                               |
| MS119   | ATATATGCATCATTAAATCAGGCAACGGC                              | fw     | pMS2; pMS2-4; pMS2-5; pMS2-6; pMS2-7 |
| MS120   | TATAGCTAGCCTCGTTAGCGAAGTTGCTTG                             | rev    | pMS2; pMS2-1; pMS2-2; pMS2-3         |
| MS148   | ATATATGCATGGCTCTCTAGATAGAGCC                               | fw     | pMS2-2                               |
| MS149   | ATATATGCATCTCAACCGGAGTTTGAAG                               | fw     | pMS2-2; pMS2-9; pMS2-11              |
| MS150   | ATATATGCATGGAGTTTGAAGCATGGCTTC                             | fw     | pMS2-3                               |
| MS151   | TATAGCTAGCTGGGGCGACAGTCACG                                 | rev    | pMS2-4; pMS2-8                       |
| MS152   | TATAGCTAGCAGTTCGCCATTGTCGAC                                | rev    | pMS2-5; pMS2-9                       |
| MS153   | TATAGCTAGCGAACTGAGTAAAGTTAGAAGC                            | rev    | pMS2-6; pMS2-10                      |
| MS154   | TATAGCTAGCAAAGTTAGAAGCCATGCTTC                             | rev    | pMS2-7; pMS2-11                      |
| MS182   | [P]GGAGTTTGAAGCATGGCTTCTAACTTTG <sup>a)</sup>              | fw     | pXX-series                           |
| MS183   | [P]TGTGTGTTGTGCTCAGTATCTCTACTG                             | rev    | p(CA)3                               |
| MS184   | [P]TGTGTGTTGTGCTCAGTATCTCTATCAC                            | rev    | p(CA)4                               |
| MS185   | [P]TGTGTGTTGTGCTCAGTATCTCTATC                              | rev    | p(CA)5                               |
| MS186   | [P]TGTGTGTTGTGCTCAGTATCTC                                  | rev    | p(CA)6                               |
| MS187   | [P]TGTGTGTTGTGCTCAGTATC                                    | rev    | p(CA)7                               |
| MS188   | [P]TGTGTGTTGTGCTCAGTATC                                    | rev    | p(CA)8                               |
| MS189   | [P]TGTGTGTTGTGCTCAGTATC                                    | rev    | p(CA)9                               |
| MS248   | [P]ATATATTTGTGCTCAGTATCTCTACTG                             | rev    | p(AU)3                               |
| MS249   | [P]ATATATTTGTGCTCAGTATCTCTATCAC                            | rev    | p(AU)4                               |
| MS250   | [P]ATATATATTTGTGCTCAGTATCTCTATC                            | rev    | p(AU)5                               |
| MS251   | [P]ATATATATATTTGTGCTCAGTATCTC                              | rev    | p(AU)6                               |
| MS252   | [P]ATATATATATATTTGTGCTCAGTATC                              | rev    | p(AU)7                               |
| MS253   | [P]ATATATATATATATTTGTGCTCAGTATC                            | rev    | p(AU)8                               |
| MS254   | [P]ATATATATATATATATTTGTGCTCAGTATC                          | rev    | p(AU)9                               |
| MS262   | [P]TTTTTTTTGTGCTCAGTATCTCTACTG                             | rev    | p(AA)3                               |
| MS263   | [P]TTTTTTTTGTGCTCAGTATCTCTATCAC                            | rev    | p(AA)4                               |
| MS266   | [P]TTGTGCTCAGTATCTCTACTGATAG                               | rev    | p00                                  |
| MS268   | [P]AAAAAATTGTGCTCAGTATCTCTACTG                             | rev    | p(UU)3                               |
| MS269   | [P]AAAAAAAATTGTGCTCAGTATCTCTATCAC                          | rev    | p(UU)4                               |

|              |                                                                  |     |          |
|--------------|------------------------------------------------------------------|-----|----------|
| <b>MS295</b> | GGAGTTTGAAGCATGGCATCTAACTTTGCTAGCAAAGGAGAAGAACTTTTCACTGGAGTTGTCC | fw  | p(XX)-M1 |
| <b>MS296</b> | GGAGTTTCAAGCATGGCATCTAACTTTGCTAGCAAAGGAGAAGAACTTTTCACTGGAGTTGTCC | fw  | p(XX)-M2 |
| <b>MS299</b> | [P]TGTGTGTGTTGTGCTCAGTATCTCTATCACTGATAGGGATGTCAATCTC             | rev | p(CA)4   |
| <b>MS300</b> | [P]TGTGTGTGTTGTGCTCAGTATCTCTATCACTGATAGGGATGTCAATCTC             | rev | p(CA)8   |

a) [P] indicates a 5' phosphate

**Table S2:** Primers used for purposes other than strain constructions

| <b>Name</b>    | <b>Sequence</b>                                               | <b>fw/rev</b> | <b>Used for</b>                           |
|----------------|---------------------------------------------------------------|---------------|-------------------------------------------|
| <b>EHO-715</b> | GATGCCTCTAGATTTAAATGCTCGAAT                                   | rev           | T7 in vitro transcription                 |
| <b>EHO-828</b> | GAATTGGGACAACCTCCAGTG                                         | rev           | reverse transcription (structure probing) |
| <b>MS073</b>   | TATTGATCGC                                                    | -             | control oligo for antisense experiments   |
| <b>MS213</b>   | TGTGTGTGTG                                                    | rev           | DNA oligo antisense to CA-series          |
| <b>MS165</b>   | GaaattaatagcactcactatagTGCATCATTAAATCAGGCAACGGC <sup>a)</sup> | fw            | pMS2 T7 in vitro                          |
| <b>MS198</b>   | GaaattaatagcactcactatagACACACAGGAGTTTGAAGCATGG                | fw            | (CA)3 T7 in vitro                         |
| <b>MS199</b>   | GaaattaatagcactcactatagACACACACAGGAGTTTGAAGCATG               | fw            | (CA)4 T7 in vitro                         |
| <b>MS200</b>   | GaaattaatagcactcactatagACACACACACAGGAGTTTGAAGC                | fw            | (CA)5 T7 in vitro                         |
| <b>MS201</b>   | GaaattaatagcactcactatagACACACACACACAGGAGTTTGAAG               | fw            | (CA)6 T7 in vitro                         |
| <b>MS202</b>   | GaaattaatagcactcactatagACACACACACACACAGGAGTTTG                | fw            | (CA)7 T7 in vitro                         |
| <b>MS203</b>   | GaaattaatagcactcactatagACACACACACACACACAGGAG                  | fw            | (CA)8 T7 in vitro                         |
| <b>MS204</b>   | GaaattaatagcactcactatagACACACACACACACACACAGGAG                | fw            | (CA)9 T7 in vitro                         |
| <b>MS255</b>   | GaaattaatagcactcactatagAATATATGGAGTTTGAAGCATGG                | fw            | (AU)3 T7 in vitro                         |
| <b>MS256</b>   | GaaattaatagcactcactatagAATATATATGGAGTTTGAAGCATG               | fw            | (AU)4 T7 in vitro                         |
| <b>MS257</b>   | GaaattaatagcactcactatagAATATATATATGGAGTTTGAAGC                | fw            | (AU)5 T7 in vitro                         |
| <b>MS258</b>   | GaaattaatagcactcactatagAATATATATATATGGAGTTTGAAG               | fw            | (AU)6 T7 in vitro                         |
| <b>MS259</b>   | GaaattaatagcactcactatagAATATATATATATATGGAGTTTG                | fw            | (AU)7 T7 in vitro                         |
| <b>MS260</b>   | GaaattaatagcactcactatagAATATATATATATATATGGAG                  | fw            | (AU)8 T7 in vitro                         |
| <b>MS261</b>   | GaaattaatagcactcactatagAATATATATATATATATATGGAG                | fw            | (AU)9 T7 in vitro                         |
| <b>MS274</b>   | GaaattaatagcactcactatagAGGAGTTTGAAGCATGG                      | fw            | 00 T7 in vitro                            |
| <b>MS267</b>   | TCACCTTACCCTCTCCACTG                                          | rev           | structure probing                         |
| <b>MS294</b>   | AATTGGGACAACCTCCAG                                            | rev           | reverse transcription (toeprint)          |

a) Lowercase letters correspond to the T7 promoter sequence.

**Table S3:** Strain construction by conventional cloning

| Plasmid | Template | fw primer | rev primer |
|---------|----------|-----------|------------|
| pMS2    | pK2      | MS119     | MS120      |
| pMS2-0  | pK2      | MS150     | MS154      |
| pMS2-1  | pK2      | MS148     | MS120      |
| pMS2-2  | pK2      | MS149     | MS120      |
| pMS2-3  | pK2      | MS150     | MS120      |
| pMS2-4  | pK2      | MS119     | MS151      |
| pMS2-5  | pK2      | MS119     | MS152      |
| pMS2-6  | pK2      | MS119     | MS153      |
| pMS2-7  | pK2      | MS119     | MS154      |
| pMS2-8  | pK2      | MS149     | MS151      |
| pMS2-9  | pK2      | MS149     | MS152      |
| pMS2-10 | pK2      | MS149     | MS153      |
| pMS2-11 | pK2      | MS149     | MS154      |

**Table S4:** Strain construction by amplification of vector

| Plasmid   | Template | fw primer | rev primer |
|-----------|----------|-----------|------------|
| p00       | pEH108   | MS182     | MS266      |
| p(AA)3    | pEH108   | MS182     | MS262      |
| p(AA)4    | pEH108   | MS182     | MS263      |
| p(UU)3    | pEH108   | MS182     | MS268      |
| p(UU)4    | pEH108   | MS182     | MS269      |
| p(AU)3    | pEH108   | MS182     | MS248      |
| p(AU)4    | pEH108   | MS182     | MS249      |
| p(AU)5    | pEH108   | MS182     | MS250      |
| p(AU)6    | pEH108   | MS182     | MS251      |
| p(AU)7    | pEH108   | MS182     | MS252      |
| p(AU)8    | pEH108   | MS182     | MS253      |
| p(AU)9    | pEH108   | MS182     | MS254      |
| p(CA)3    | pEH108   | MS182     | MS183      |
| p(CA)4    | pEH108   | MS182     | MS184      |
| p(CA)5    | pEH108   | MS182     | MS185      |
| p(CA)6    | pEH108   | MS182     | MS186      |
| p(CA)7    | pEH108   | MS182     | MS187      |
| p(CA)8    | pEH108   | MS182     | MS188      |
| p(CA)9    | pEH108   | MS182     | MS189      |
| p00-M1    | pEH108   | MS295     | MS266      |
| p00-M2    | pEH108   | MS296     | MS266      |
| p(CA)4-M1 | pEH108   | MS295     | MS299      |
| p(CA)4-M2 | pEH108   | MS296     | MS299      |
| p(CA)6-M1 | pEH108   | MS295     | MS186      |
| p(CA)6-M2 | pEH108   | MS296     | MS186      |
| p(CA)8-M1 | pEH108   | MS295     | MS300      |
| p(CA)8-M2 | pEH108   | MS296     | MS300      |

**Table S5:** DNA templates for transcription

| <b>RNA</b>   | <b>Template</b> | <b>fw primer</b> | <b>rev primer</b> | <b>Purpose</b>    |
|--------------|-----------------|------------------|-------------------|-------------------|
| <b>00</b>    | p00             | MS274            | EHO-715           | Translation       |
| <b>MS2</b>   | pMS2            | MS165            | EHO-715           | Translation       |
| <b>(AU)3</b> | p(AU)3          | MS255            | EHO-715           | Translation       |
| <b>(AU)4</b> | p(AU)4          | MS256            | EHO-715           | Translation       |
| <b>(AU)5</b> | p(AU)5          | MS257            | EHO-715           | Translation       |
| <b>(AU)6</b> | p(AU)6          | MS258            | EHO-715           | Translation       |
| <b>(AU)7</b> | p(AU)7          | MS259            | EHO-715           | Translation       |
| <b>(AU)8</b> | p(AU)8          | MS260            | EHO-715           | Translation       |
| <b>(AU)9</b> | p(AU)9          | MS261            | EHO-715           | Translation       |
| <b>(CA)3</b> | p(CA)3          | MS198            | EHO-715           | Translation       |
| <b>(CA)4</b> | p(CA)4          | MS199            | EHO-715           | Translation       |
| <b>(CA)5</b> | p(CA)5          | MS200            | EHO-715           | Translation       |
| <b>(CA)6</b> | p(CA)6          | MS201            | EHO-715           | Translation       |
| <b>(CA)7</b> | p(CA)7          | MS202            | EHO-715           | Translation       |
| <b>(CA)8</b> | p(CA)8          | MS203            | EHO-715           | Translation       |
| <b>(CA)9</b> | p(CA)9          | MS204            | EHO-715           | Translation       |
| <b>00</b>    | p00             | MS274            | MS267             | Structure probing |
| <b>(CA)4</b> | p(CA)4          | MS199            | MS267             | Structure probing |
| <b>(CA)6</b> | p(CA)6          | MS201            | MS267             | Structure probing |
| <b>(CA)8</b> | p(CA)8          | MS203            | MS267             | Structure probing |
